# Supplementary material
Source: MDPI journal article supplement (https://www.mdpi.com/2311-7524/9/12/1321)
Supplement: s1 [file s1]

**Table S1-** Main physical and chemical parameters of soil for each study area: Molise, Campania and Sicily.

| Parameters                                                      | Experimental site      |                        |                              |
|-----------------------------------------------------------------|------------------------|------------------------|------------------------------|
|                                                                 | MOL<br>(San Biase, CB) | CAM<br>(Galluccio, CE) | SIC<br>(Zafferana Etnea, CT) |
| pH                                                              | 8.3                    | 7.1                    | 7.0                          |
| EC (dS/m)                                                       | 0.135                  | 0.047                  | 0.034                        |
| Sand (coarse) (g/Kg)                                            | 56.4                   | 172.5                  | 439.9                        |
| Sand (fine) (g/Kg)                                              | 234.2                  | 297.7                  | 478.9                        |
| Silt (g/Kg)                                                     | 195.0                  | 215.9                  | 68.4                         |
| Clay (g/Kg)                                                     | 514.2                  | 313.9                  | 12.7                         |
| Organic carbon (g/Kg)                                           | 10.8                   | 3.7                    | 25.0                         |
| Organic matter (g/Kg)                                           | 18.6                   | 6.4                    | 43.2                         |
| Nitrogen (g/Kg)                                                 | 1.3                    | 0.4                    | 2.3                          |
| C/N ratio                                                       | 7.6                    | 7.0                    | 10.7                         |
| Assimilable phosphorus (P <sub>2</sub> O <sub>5</sub> ) (mg/Kg) | 25.9                   | 42.5                   | 23.9                         |
| CSC (meq/ 100g)                                                 | 31.0                   | 17.4                   | 17.3                         |
| Exchangeable Ca (meq/ 100g)                                     | 25.7                   | 3.7                    | 9.8                          |
| Exchangeable Mg (meq/ 100g)                                     | 3.4                    | 1.8                    | 0.7                          |
| Exchangeable Na (meq/ 100g)                                     | 0.3                    | 0.1                    | 0.1                          |
| Exchangeable K (meq/ 100g)                                      | 1.4                    | 1.5                    | 0.6                          |
| Exchangeable Fe (mg/ Kg)                                        | 14.8                   | 49.0                   | 61.5                         |
| Exchangeable Cu (mg/ Kg)                                        | 17.0                   | 4.5                    | 4.5                          |
| Exchangeable Zn (mg/ Kg)                                        | 2.6                    | 5.9                    | 0.9                          |
| Exchangeable Mn (mg/ Kg)                                        | 6.9                    | 56.6                   | 0.5                          |
